# Supplementary material for: Detecting and delivering platinum anticancer drugs using fluorescent maghemite nanoparticles
Source: Royal Society of Chemistry journal article supplement (doi:10.1039/c3cc39059d), 2013-01-01
Supplement: c3cc39059d.pdf [file c3cc39059d.pdf]

## Electronic Supplementary Information

### Detecting and delivering platinum anticancer drug by fluorescent maghemite nanoparticles

Jinzhuang Wang, Xiaoyong Wang,\* Yajie Song, Chengcheng Zhu, Jing Wang, Kun  
Wang and Zijian Guo\*

#### Contents

#### 1 Experimental

1.1 Reagents and materials

1.2 Methods

1.3 Synthesis and characterization of CMDP-OTPBA-R6G-SPION

1.4 Agarose gel electrophoresis

1.5 Cytotoxicity assay

1.6 In vitro and in vivo fluorescence imaging

1.7 Cellular uptake

#### 2 Supplementary Figures

**Fig. S1** XPS spectrum of CMDP-OTPBA-R6G-SPION

**Fig. S2** Emission spectrum of CMDP-OTPBA-R6G-SPION

**Fig. S3**  $T_2$  relaxation rate versus the Fe concentration curve and  $T_2$ -weighted MR images of CMDP-OTPBA-R6G-SPION

**Fig. S4** FTIR spectra of  $\gamma$ -Fe<sub>2</sub>O<sub>3</sub>, OTPBA, R6G and CMDP-OTPBA-R6G-SPION

**Fig. S5** SEM and TEM images of  $\gamma$ -Fe<sub>2</sub>O<sub>3</sub> nanoparticles

**Fig. S6** Magnetization curve of CMDP-OTPBA-R6G-SPION and SPION

#### 3 References

## 1 Experimental

### 1.1 Reagents and materials

Cisplatin was obtained from Shandong Boyuan Chemical Co., Ltd. Supercoiled pUC19 plasmid DNA was purchased from TaKaRa Biotechnology (Dalian). Tris-(hydroxymethyl)aminomethane and ethidium bromide (EB) were purchased from Sigma. (3-Aminopropyl)-triethoxy-silane, R6G and tetraethylorthosilicate were purchased from Alfa-aesar.  $\text{FeCl}_3 \cdot 6\text{H}_2\text{O}$ , NaOH, succinic anhydride, ethylene glycol (EG) and other chemical reagents were of analytical grade and used as received without further purification. Doubly deionized water ( $18.2 \text{ M}\Omega \cdot \text{cm}$  at  $25^\circ\text{C}$ ) prepared on a Milli-Q (MQ) water system was used throughout all experiments.

### 1.2 Methods

Images of scanning electron microscopy (SEM) were taken using Hitachi S-4800 field emission electron microscope at an accelerating voltage of 5 kV; and those of TEM were obtained using a JEOL JEM-2100 transmission electron microscope at an accelerating voltage of 200 kV. Samples for TEM were prepared by dripping a droplet of dilute phosphate-buffered saline (PBS) sample solution ( $5 \mu\text{L}$ ) onto a carbon-coated copper grid and drying at room temperature. X-ray photoelectron spectra (XPS) were acquired on a Thermo ESCALAB 250 electron spectrometer with 150 W monochromatized Al  $K\alpha$  radiation ( $1486.6 \text{ eV}$ ), where all peaks were referred to the signature C1s peak for adventitious carbon at  $284.8 \text{ eV}$ . FTIR spectra were recorded on a Nicolet 6700 Fourier transform infrared spectrograph in the range of  $4000\text{--}400 \text{ cm}^{-1}$ . Field-dependent magnetization measurements were carried out on the superconducting quantum interference device (SQUID, Quantum Design) magnetometer by MPMS-XL-7T instrument at 300 K. The inductively coupled plasma mass spectrometry (ICP-MS) data were determined using a standard Plasma-Quad II instrument (VG Elemental, Thermo Optek Corp.). MRI experiments were performed at gradient concentrations in terms of iron in the PBS buffer on a 3.0 T MR scanner (3 T Siemens Magnetom Trio, Siemens, Germany) with a spin-echo pulse sequence. The transverse relaxivity ( $r_2$ ) was calculated according to the measured  $T_2$ . The fast spin-echo was performed under the following conditions:

matrix size =  $256 \times 256$ , field of view (FOV) =  $160 \text{ mm} \times 160 \text{ mm}$ , slice thickness (SL) = 3 mm, echo time (TE) = 12.3 ms, repetition time (TR) = 1500 ms, and number of acquisitions = 1. Confocal fluorescence microscopic images of the cells and zebrafish were obtained using fluorescence microscope (Olympus TH4-200) and ZEISS Laser Scanning Microscope (LSM 710). All experiments with live animals were performed in compliance with the relevant laws in China and approved by Nanjing University.

### 1.3 Synthesis and characterization of the CMDP-OTPBA-R6G-SPION

$\text{Fe}_3\text{O}_4$  NPs were prepared by a modified literature method.<sup>1</sup>  $\gamma\text{-Fe}_2\text{O}_3$  NPs were obtained by oxidizing  $\text{Fe}_3\text{O}_4$  NPs in  $\text{HNO}_3$  (0.01 M) at  $95^\circ\text{C}$  for 1 h. OTPBA were obtained according to the reported procedures.<sup>2</sup>  $\gamma\text{-Fe}_2\text{O}_3$  NPs (30 mg) and R6G (0.5 g) were dispersed into the mixture solution of isopropanol (200 mL),  $\text{H}_2\text{O}$  (2 mL) and  $\text{NH}_3\cdot\text{H}_2\text{O}$  (1 mL) under ultrasonic wave for 30 min. Ethanol (10 mL) solution of tetraethylorthosilicate (TEOS, 500  $\mu\text{L}$ ) was added slowly into the reaction system within 1 h and the temperature was kept at  $50^\circ\text{C}$  for 3 h. The coated magnetic nanoparticles (R6G-SPION) were collected by magnetic separation, washed with water and ethanol for at least five times to remove the unreacted TEOS and R6G. R6G-SPION was again dispersed into the mixture solution as described above. OTPBA (0.5 g) was added slowly into the reaction system within 1 h and kept reacting for 3 h at  $50^\circ\text{C}$ . OTPBA-R6G-SPION was gained by magnetic separation. The unreacted OTPBA was removed by washing with water and ethanol for at least five times respectively.

Cisplatin (90 mg) and  $\text{AgNO}_3$  (51 mg) were dissolved in *N,N*-dimethylformamide (DMF, 9 mL) and stirred in the dark at room temperature for 12 h. The resultant suspension was centrifuged to remove the precipitate and CMDP was acquired in the supernatant. OTPBA-R6G-SPION was dispersed into the solution of CMDP and sonicated to give a suspension, which was stirred vigorously for 48 h. CMDP-OTPBA-R6G-SPION was obtained with magnetic separation. The redundant CMDP was removed by washing with DMF and ethanol. Exhaustive separation was checked by detecting platinum content in the supernatant with ICP-MS. The loading ratio of Pt to the conjugate was also determined by ICP-MS. The sample for ICP-MS

was treated with concentrated  $\text{HNO}_3$  at  $95\text{ }^\circ\text{C}$  for 2 h. The average of three replicates was taken as the final result.

#### *1.4 Agarose gel electrophoresis*

Supercoiled pUC19 DNA ( $20\text{ ng }\mu\text{L}^{-1}$ ) was treated with gradient concentrations of CMDP-OTPBA-R6G-SPION in the buffer of pH 7.4 (50 mM Tris-HCl/50 mM NaCl) and pH 5.2 (50 mM HAc-NaAc, 50 mM NaCl), respectively. The mixtures (10  $\mu\text{L}$ ) were incubated at  $37\text{ }^\circ\text{C}$  for 24 h. The resulting solutions were loaded onto the agarose gel (1%) and subjected to electrophoresis in a TAE buffer (40 mM Tris acetate and 1 mM EDTA). DNA bands were stained by EB, visualized under UV light, and photographed.

#### *1.5 Cytotoxicity assay*

The cytotoxicity of CMDP-OTPBA-R6G-SPION was investigated by the 3-(4,5-dimethyl-thiazol-2-yl)-2,5-diphenyltetrazolium bromide (MTT) assay with cisplatin as the reference. Briefly, A549 and A549R cell lines were seeded respectively in 96-well plates at 5000 cells per well in Dulbecco's modified Eagle's medium and incubated at  $37\text{ }^\circ\text{C}$  in the humidified atmosphere with 5%  $\text{CO}_2$  for 24 h. The cells were then treated in triplicate with fresh medium containing grade concentrations of CMDP-OTPBA-R6G-SPION and cisplatin (in terms of Pt), respectively. Aliquot of MTT ( $20\text{ }\mu\text{L}$ ,  $5\text{ mg mL}^{-1}$ ) PBS solution was added to each of the wells after the cells were incubated at  $37\text{ }^\circ\text{C}$  for 48 and 72 h, respectively. The supernatant was taken off after 4 h of incubation and DMSO (200  $\mu\text{L}$ ) was added to each well. The remanent nanocomposite was attracted to the bottom of 96-well plate by an external magnet under the well for 20 min, and the supernatant (100  $\mu\text{L}$ ) was removed to another 96-well plate for the enzyme-linked immunosorbent assay (ELISA). The absorbance at 570 nm was determined using an ELISA plate reader. The cytotoxicity was calculated based on the data of three replicate tests.

#### *1.6 In vitro and in vivo fluorescence imaging*

A549 and A549R cells ( $2.5 \times 10^5$ ) were cultured in 6 cm plates containing Dulbecco's modified Eagle medium (DMEM) supplemented with fetal bovine serum (10%), penicillin ( $100\text{ units mL}^{-1}$ ), streptomycin ( $100\text{ }\mu\text{g mL}^{-1}$ ), and  $\text{NaHCO}_3$  ( $3.7$

mg mL<sup>-1</sup>). After incubation for 24 h, CMDP-OTPBA-R6G-SPION (120 µg mL<sup>-1</sup>) was added to the dishes and incubated for 24 and 48 h at 37 °C, respectively. Before imaging, the culture medium was removed and the cells were rinsed three times with 1 × PBS. The fluorescence image was recorded by a confocal fluorescence microscope. The band path is from 550 to 600 nm, and the excitation wavelength is 530 nm.

The 5-day-old zebrafish larva was incubated with CMDP-OTPBA-R6G-SPION (24 µg mL<sup>-1</sup>) in distilled water for 10 h at 28 °C. After washing with distilled water to remove the nanocomposite, the zebrafish larva was imaged by both fluorescence microscope and laser scanning confocal fluorescence microscope.

### 1.7 Cellular uptake

A549 and A549R cells ( $2.5 \times 10^5$ ) were seeded in 6 cm plates containing Dulbecco's modified Eagle's medium and incubated overnight at 37 °C in a humidified atmosphere of 5 % CO<sub>2</sub> for 24 h. The medium was then replaced with medium containing CMDP-OTPBA-R6G-SPION (120 µg mL<sup>-1</sup>) and incubated for 12, 24 and 48 h. The medium was removed, and the cells were then washed with ice-cold PBS and digested by addition of trypsin (200 µL) to each plate. The cells were then collected and digested by HNO<sub>3</sub> (100 µL) and H<sub>2</sub>O<sub>2</sub> (25 µL) for 2 h at 95 °C respectively, and HCl (40 µL) was continually added for 30 min at room temperature. The samples were then diluted to 1 mL. The content of platinum and iron in the samples was determined by ICP-MS.

## 2 Supplementary Figures

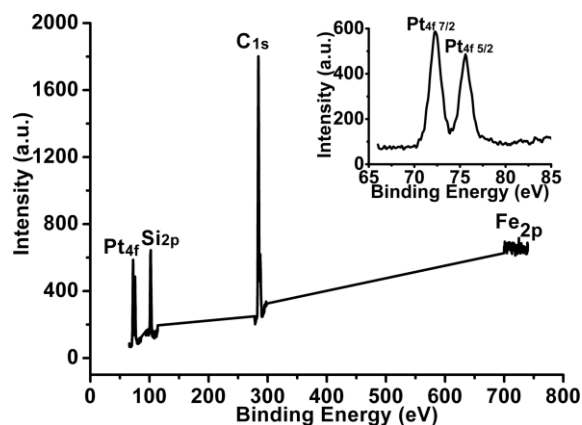

**Fig. S1** XPS spectrum of CMDP-OTPBA-R6G-SPION. Inset shows the high

resolution XPS spectrum of Pt4f.

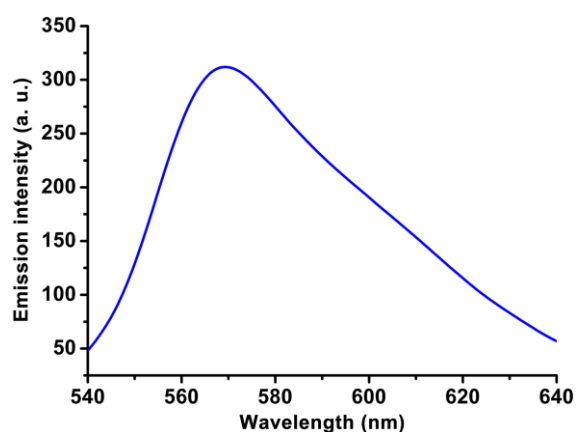

**Fig. S2** Emission spectrum ( $\lambda_{\text{ex}} = 530 \text{ nm}$ ) of CMDP-OTPBA-R6G-SPION in PBS (pH 7.4).

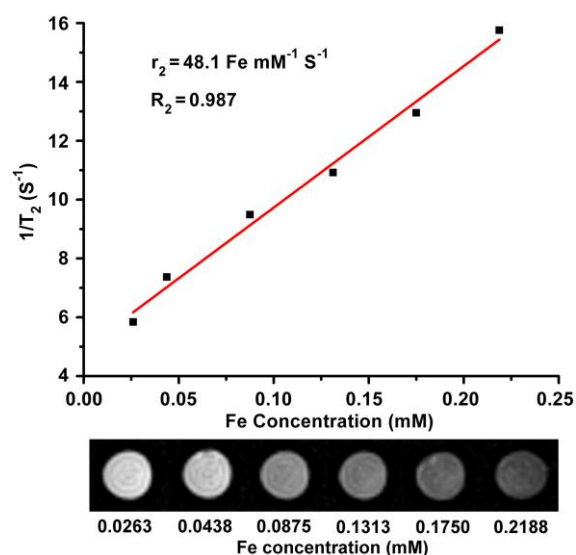

**Fig. S3**  $T_2$  relaxation rate ( $1/T_2$ ) versus the Fe concentration (top) and  $T_2$ -weighted MR images of CMDP-OTPBA-R6G-SPION (bottom) in the PBS buffer (pH 7.4) solutions at different Fe concentrations. The transverse relaxivity ( $r_2$ ), was calculated according to the equation:  $1/T_2 = 1/T^0 + r_2 \cdot [\text{Fe}]$ , where  $1/T_2$  is the observed relaxation rate in the presence of the nanocomposite,  $1/T^0$  is the relaxation rate of pure water, and  $[\text{Fe}]$  is the concentration of CMDP-OTPBA-R6G-SPION.<sup>2</sup>

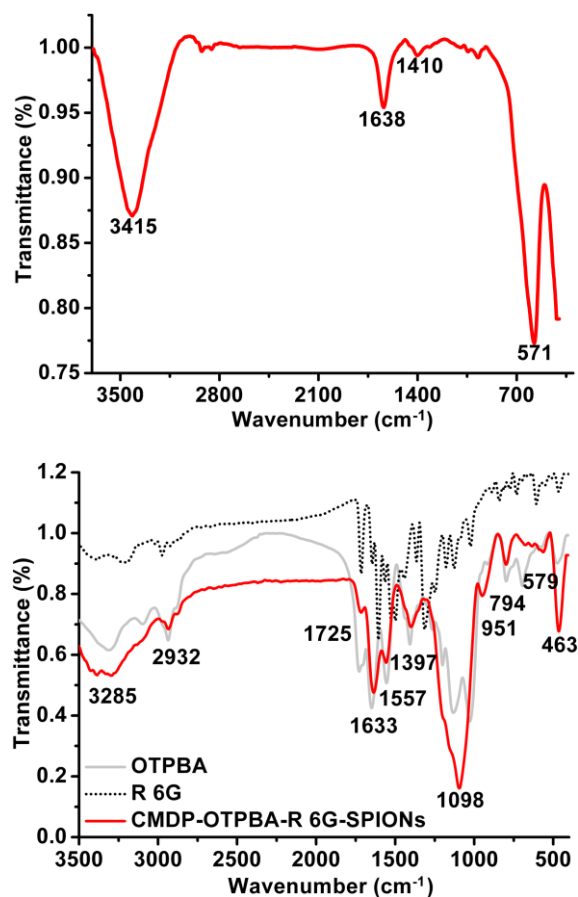

**Fig. S4** FTIR spectra (KBr) of  $\gamma$ -Fe<sub>2</sub>O<sub>3</sub> nanoparticles (top), OTPBA, R6G and CMDP-OTPBA-R6G-SPION (bottom). Attributions (cm<sup>-1</sup>): 3285,  $\nu_{\text{O-H}}$ ; 2932,  $\nu_{\text{CH}_2}$ ; 1725,  $\nu_{\text{C=O}}$  carboxylic acid; 1633,  $\nu_{\text{C=O}}$  amide; 1557,  $\delta_{\text{N-H}}$ ; 1397, 1098,  $\delta_{\text{Si-O}}$ ; 579,  $\nu_{\text{Fe-O}}$ .

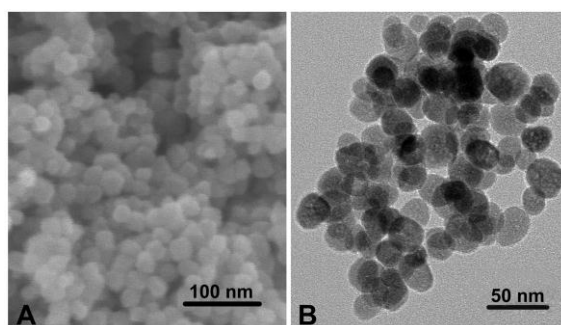

**Fig. S5** SEM (A) and TEM (B) images of  $\gamma$ -Fe<sub>2</sub>O<sub>3</sub> nanoparticles.

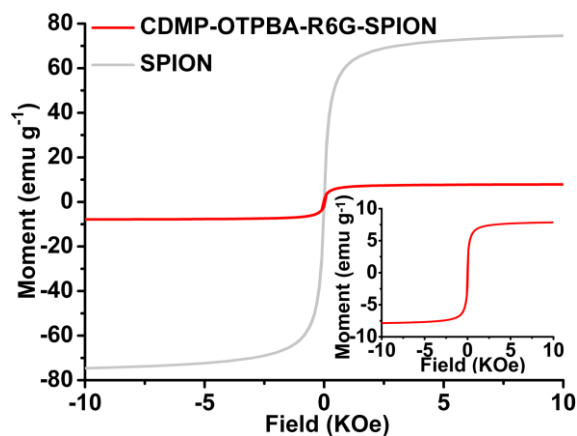

**Fig. S6** Magnetization curve of CMDP-OTPBA-R6G-SPION and SPION at room temperature.

### 3 References

1. L. Y. Wang, J. Bao, L. Wang, F. Zhang and Y. D. Li, *Chem. Eur. J.*, 2006, **12**, 6341.
2. J. Aburto, M. Ayala, I. Bustos-Jaimes, C. Montiel, E. Terrés, J. M. Domínguez and E. Torres, *Microporous Mesoporous Mat.*, 2005, **83**, 193–200.
3. Hong Yang, Cuixia Zhang, Xiangyang Shi, He Hu, Xiaoxia Du, Yong Fang, Yanbin Ma, Huixia Wu and Shiping Yang, *Biomaterials*, 2010, **31**, 3667–3673.
